# Supplementary material
Source: PubMed Central journal article supplement (PMC10050103)
Supplement: NIHMS1876425-supplement-Schilperoort_et_al__Supplement.pdf [file NIHMS1876425-supplement-Schilperoort_et_al__Supplement.pdf]

## A ... BMDMs

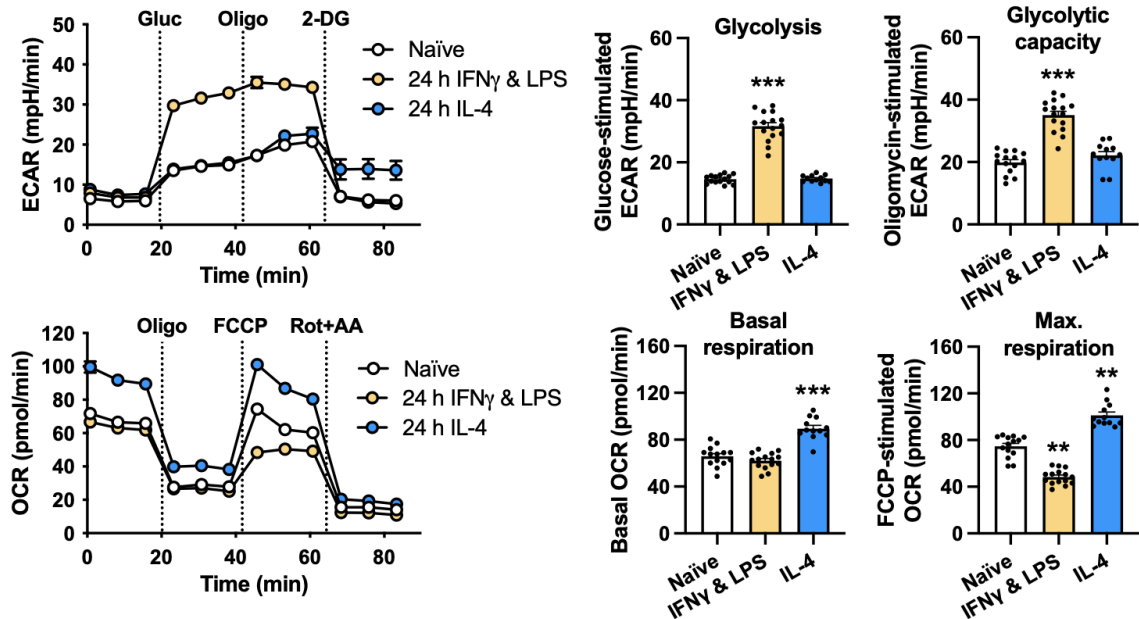

## B ... HMDMs

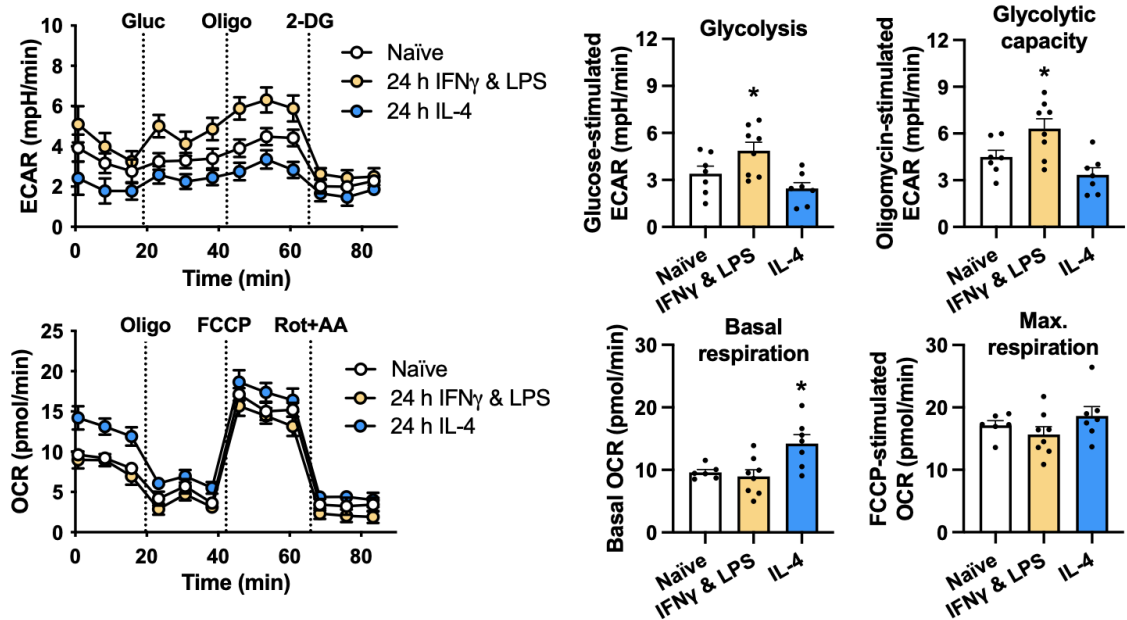

**Suppl. Figure 1. Seahorse analysis of macrophages treated with either IFN $\gamma$  and LPS or IL-4.** Naïve BMDMs (A) and HMDMs (B) were polarized towards a pro-inflammatory phenotype with IFN $\gamma$  and LPS or a pro-resolving phenotype with IL-4 for 24 h followed by Seahorse analysis. The extracellular acidification rate (ECAR), a measure of glycolysis, was measured at baseline and after the addition of glucose (“glycolysis”), oligomycin (“glycolytic capacity”), and 2-DG. The oxygen consumption rate (OCR), a measure of oxidative phosphorylation, was measured at baseline (“basal respiration”) and after the addition of oligomycin, FCCP (“maximal respiration”), and rotenone plus antimycin A ( $n = 15-16$  and  $n = 7-8$  wells/group for BMDMs and HMDMs, respectively). All values are means  $\pm$  SEM. \* $P < 0.05$ , \*\* $P < 0.01$ , \*\*\* $P < 0.001$  as compared to the naïve groups, determined by one ANOVA with Fisher’s LSD post hoc analysis.

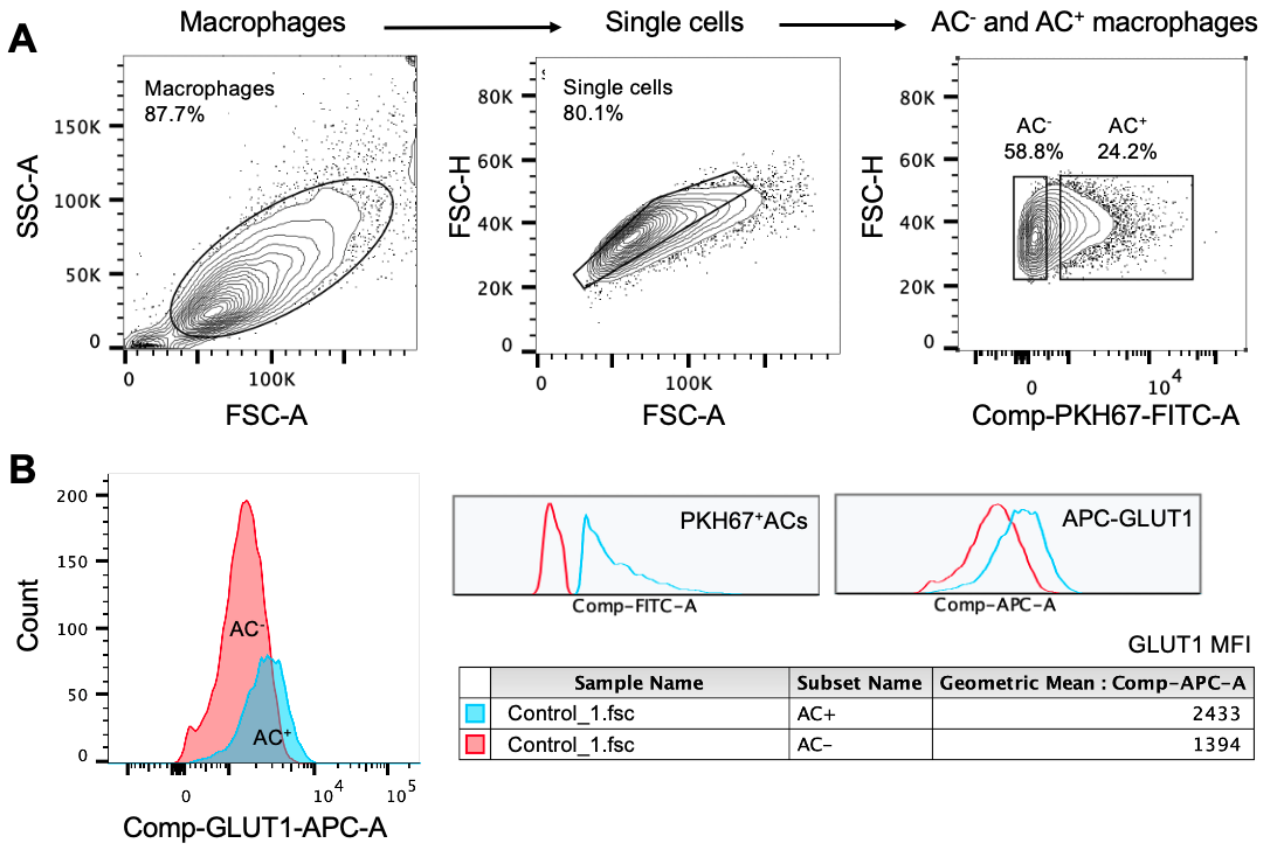

**Suppl. Figure 2. Flow cytometry analysis of cell-surface GLUT1 expression in efferocytic macrophages.** BMDMs were incubated with PKH67-labeled apoptotic cells (ACs) for 45 min, rinsed and harvested 1 h later for flow cytometric analysis of cell-surface GLUT1 using an APC-conjugated GLUT1 antibody. **(A)** Gating strategy for AC<sup>-</sup> and AC<sup>+</sup> macrophages, with PKH67 detected in the FITC channel. **(B)** The mean fluorescent intensity (MFI) of cell-surface GLUT1 based on the flow cytometric data.

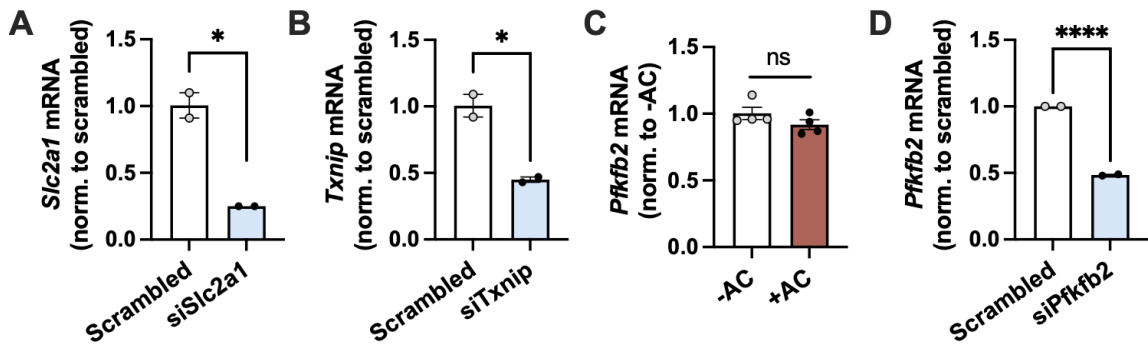

**Suppl. Figure 3. RT-qPCR analysis to test siRNA silencing efficiency and efferocytosis-induced gene expression.** (A) BMDMs were transfected with scrambled RNA or siSlc2a1, and *Slc2a1* expression was measured by RT-qPCR ( $n = 2$  wells/group). (B) BMDMs were transfected with scrambled RNA or siTxnip, and *Txnip* expression was measured by RT-qPCR ( $n = 2$  wells/group). (C) BMDMs were incubated in the absence or presence of ACs for 45 min, rinsed, and *Pfkfb2* expression was measured 1 h later ( $n = 4$  wells/group). (D) BMDMs were transfected with scrambled RNA or siPfkfb2, and *Pfkfb2* expression was measured by RT-qPCR ( $n = 2$  wells/group). All values are means  $\pm$  SEM. \* $P < 0.05$ , \*\*\*\* $P < 0.0001$  as compared with the indicated control groups, determined by the two-tailed Student's t-test. ns, not significant ( $P > 0.05$ ).

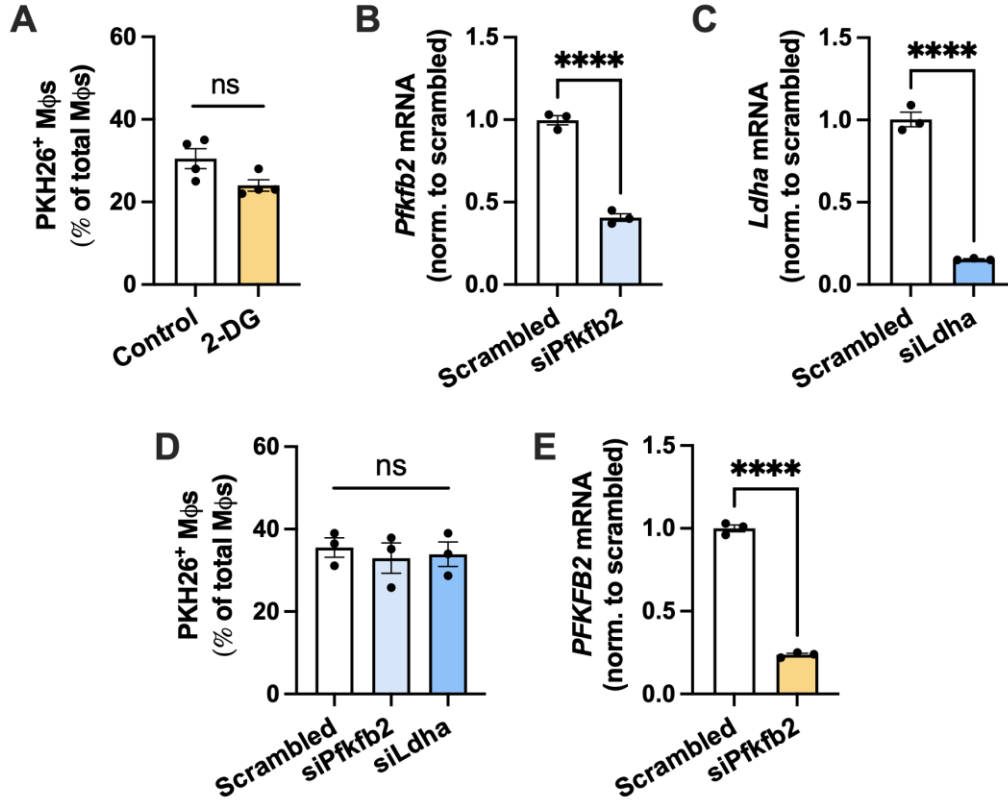

**Suppl. Figure 4. Additional efferocytosis assays and validation of siRNA silencing efficiency.** (A) BMDMs were pretreated without or with 10 mM 2-DG for 1 h, followed by incubation with PKH26-labeled apoptotic Jurkat cells (ACs) for 45 min. Unengulfed ACs were then rinsed away, and the number of PKH26<sup>+</sup> macrophages were quantified as a measure of single efferocytosis ( $n = 4$  wells/group). (B) BMDMs were transfected with scrambled RNA or si*Pfkfb2*, and *Pfkfb2* gene expression was measured by RT-qPCR ( $n = 3$  wells/group). (C) BMDMs were transfected with scrambled RNA or si*Ldha*, and *Ldha* gene expression was measured by RT-qPCR ( $n = 3$  wells/group). (D) BMDMs were transfected with scrambled RNA, si*Pfkfb2* or si*Ldha*, followed by a single efferocytosis assay as described for panel A ( $n = 3$  wells/group). (E) HMDMs were transfected with scrambled RNA or si*Pfkfb2*, and *PFKFB2* gene expression was measured by RT-qPCR ( $n = 3$  wells/group). All values are means  $\pm$  SEM. \*\*\*\* $P < 0.0001$  as compared with the indicated control groups, determined by the two-tailed Student's t-test (A-C & E) or two-way ANOVA with Fisher's LSD post hoc analysis in panel D. ns, not significant ( $P > 0.05$ ).

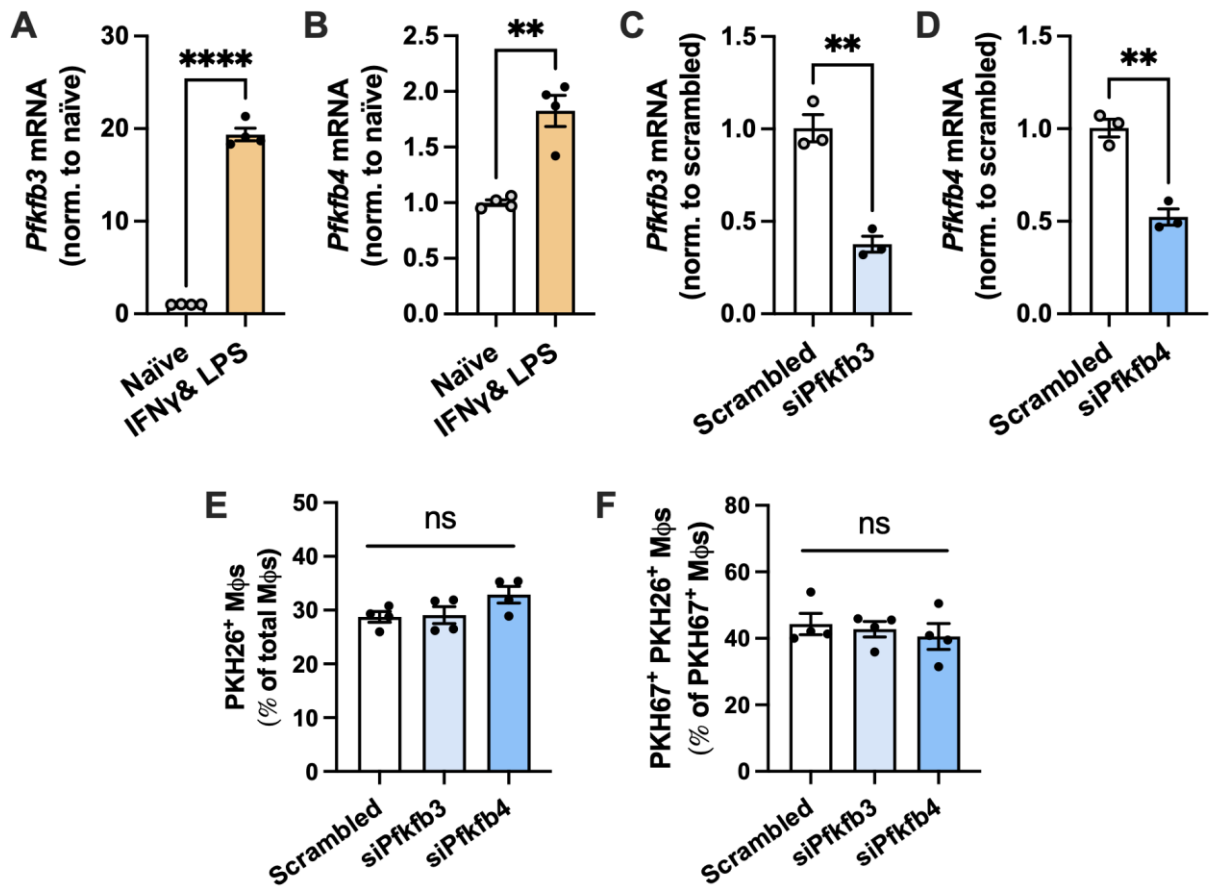

**Suppl. Figure 5. *Pfkfb3* and *Pfkfb4* are upregulated by IFN $\gamma$  and LPS, and partial silencing of *Pfkfb3* and *Pfkfb4* does not affect efferocytosis.** (A-B) Expression levels of *Pfkfb3* and *Pfkfb4* were measured by RT-qPCR in naïve macrophages and macrophages polarized towards a pro-inflammatory phenotype with IFN $\gamma$  and LPS ( $n = 4$  wells/group). (C) BMDMs were transfected with scrambled RNA or si*Pfkfb3*, and *Pfkfb3* expression was measured ( $n = 3$  wells/group). (D) BMDMs were transfected with scrambled RNA or si*Pfkfb4*, and *Pfkfb4* expression was measured ( $n = 3$  wells/group). (E) BMDMs transfected with scrambled RNA, si*Pfkfb3*, or si*Pfkfb4* were incubated with PKH26-labeled apoptotic Jurkat cells (ACs) for 45 min. Unengulfed ACs were removed by rinsing, and the number of PKH26<sup>+</sup> macrophages were quantified ( $n = 4$  wells/group). (F) BMDMs transfected with scrambled RNA, si*Pfkfb3*, or si*Pfkfb4* were first incubated with PKH67-labeled ACs for 45 min, rinsed, and 2 h later incubated with PKH26-labeled ACs for 45 min. The number of PKH67<sup>+</sup> PKH26<sup>+</sup> M $\phi$ s relative to PKH67<sup>+</sup> M $\phi$ s was quantified as a measure of continual efferocytosis ( $n = 4$  wells/group). All values are means  $\pm$  SEM. \*\* $P < 0.01$ , \*\*\*\* $P < 0.0001$  as compared with the indicated control groups, determined by the two-tailed Student's t-test (A-D) or one ANOVA with Fisher's LSD post hoc analysis (E-F). ns, not significant ( $P > 0.05$ ).

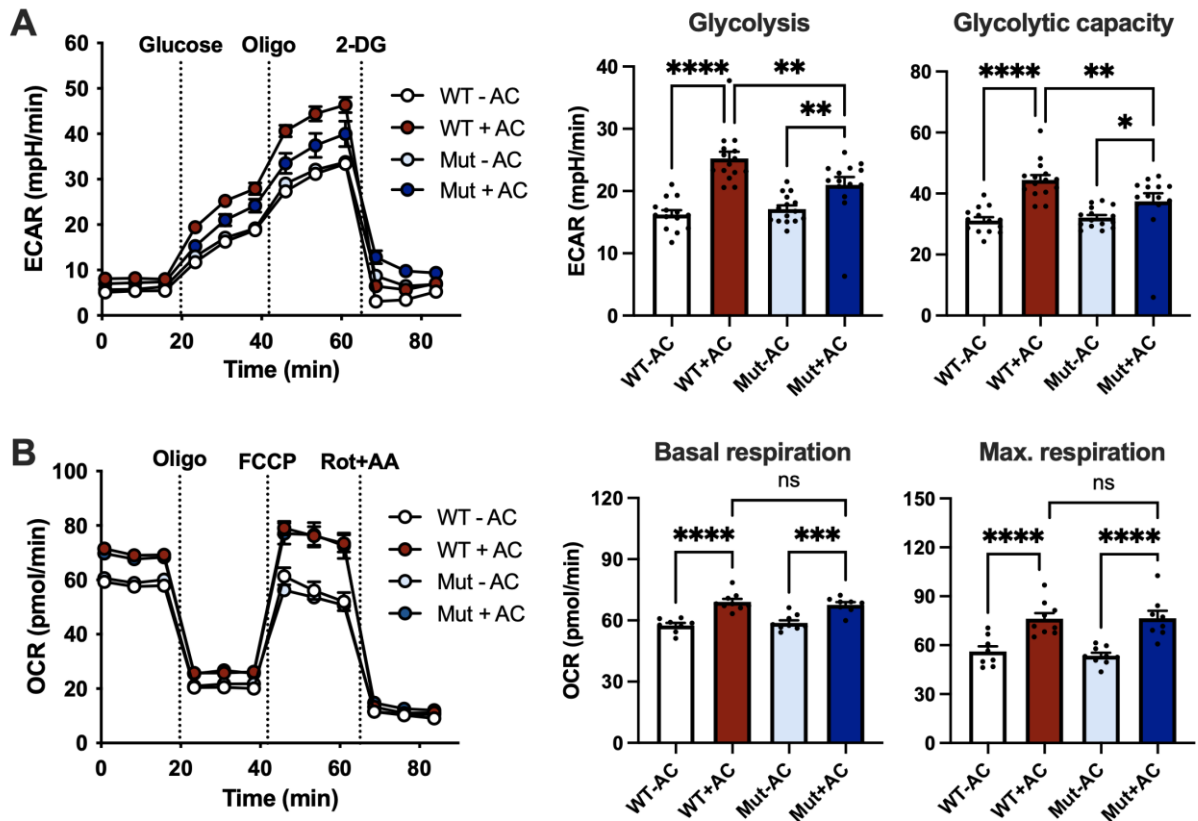

**Suppl. Figure 6. Macrophages from PFKFB2 mutant mice show attenuated efferocytosis-induced glycolysis.** BMDMs from PFKFB2 mutant mice and wild-type littermates were subjected to Seahorse analysis. **(A)** The extracellular acidification rate (ECAR), a measure of glycolysis, was measured at baseline and after the addition of glucose (“glycolysis”), oligomycin (“glycolytic capacity”), and 2-DG ( $n = 8-9$  wells/group). **(B)** The oxygen consumption rate (OCR), a measure of oxidative phosphorylation, was measured at baseline (“basal respiration”) and after the addition of oligomycin, FCCP (“maximal respiration”), and rotenone plus antimycin A ( $n = 8-9$  wells/group). All values are means  $\pm$  SEM. \* $P < 0.05$ , \*\* $P < 0.01$ , \*\*\* $P < 0.001$ , \*\*\*\* $P < 0.0001$  as compared with the indicated control groups, determined by two ANOVA with Fisher’s LSD post hoc analysis. ns, not significant ( $P > 0.05$ ).

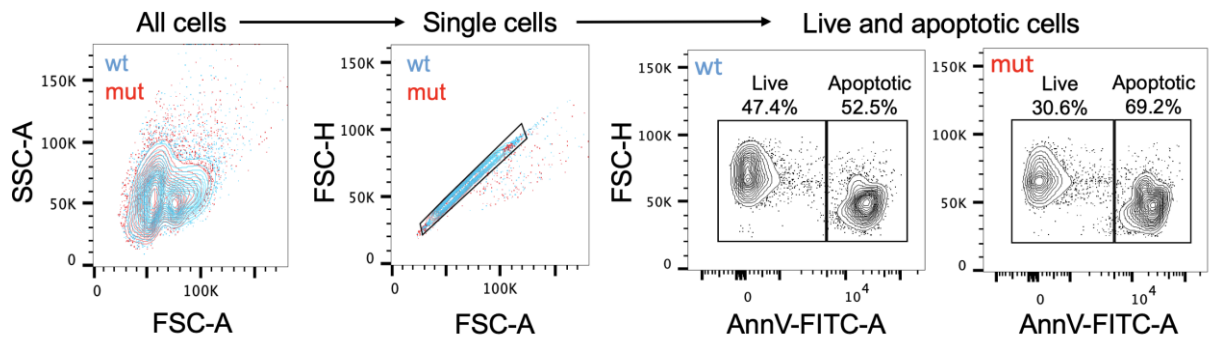

**Suppl. Figure 7. Flow cytometric analysis of apoptotic thymocytes from the dexamethasone-thymus experiment.** All cells were isolated from the thymi of hematopoietic PFKFB2 mutant and wild-type mice of the dexamethasone-thymus experiment (see Fig. 5 of the main manuscript) and subjected to flow cytometric analysis. The cells were immunostained for the apoptotic cell marker annexin V (AnnV; FITC) and, using the depicted gating strategy, quantified for the percentages of AnnV<sup>-</sup> (live) and AnnV<sup>+</sup> (apoptotic) thymocytes.

## Supplementary Table

Supplementary Table 1. Primer sequences used for quantitative RT-PCR analysis

| Gene           | Species | Primer sequence (5' → 3') |                          |
|----------------|---------|---------------------------|--------------------------|
|                |         | Forward                   | Reverse                  |
| <i>Ldha</i>    | Mouse   | TGTCTCCAGCAAAGACTACTGT    | GACTGTACTTGACAATGTTGGGA  |
| <i>Pfkfb2</i>  | Mouse   | ACATGCTCATGGGCTTCCTAT     | GTTGAGGTAGCGTGTTAGTTTCT  |
| <i>Rplp0</i>   | Mouse   | GGACCCGAGAAGACCTCCTT      | GCACATCACTCAGAATTTCAATGG |
| <i>Slc2a1</i>  | Mouse   | GCAGTTCGGCTATAAACTGG      | GCGGTGGTTCATGTTTGATTG    |
| <i>Slc16a1</i> | Mouse   | TGTTAGTCGGAGCCTTCATTC     | CACTGGTCGTTGCACTGAATA    |
| <i>Txnip</i>   | Mouse   | TCTTTTGAGGTGGTCTTCAACG    | GCTTTGACTCGGGTAACTCACA   |
